1 **Cell-to-cell spread inhibiting antibodies constitute a correlate of**  
2 **protection against Herpes Simplex Virus Type 1 reactivations**

3 Susanne Wolf<sup>1\*</sup>, Mira Alt<sup>1,5\*</sup>, Robin Dittrich<sup>1,2</sup>, Miriam Dirks<sup>1</sup>, Leonie Schipper<sup>5</sup>, Ulrich Wilhelm  
4 Aufderhorst<sup>1,5</sup>, Kordula Rainer<sup>3,4</sup>, Ulf Dittmer<sup>1</sup>, Oliver Witzke<sup>5</sup>, Bernd Giebel<sup>2</sup>, Mirko Trilling<sup>1</sup>,  
5 Christiane Silke Heilingloh<sup>5</sup>, Ramin Lotfi<sup>3,4</sup>, Michael Roggendorf<sup>1#a</sup>, and Adalbert Krawczyk<sup>1,5</sup>

6  
7 <sup>1</sup> Institute for Virology, University Hospital Essen, University of Duisburg-Essen, Essen,  
8 Germany

9 <sup>2</sup> Institute for Transfusion Medicine, University Hospital Essen, University of Duisburg-Essen,  
10 Essen, Germany

11 <sup>3</sup> Institute for Clinical Transfusion Medicine and Immunogenetics Ulm, German Red Cross  
12 Blood Transfusion Service Baden-Württemberg - Hessen and University Hospital Ulm  
13 Germany

14 <sup>4</sup> Institute for Transfusion Medicine, University of Ulm, Germany

15 <sup>5</sup> Department of Infectious Diseases, University Hospital Essen, University of Duisburg-Essen,  
16 Essen, Germany

17 <sup>#a</sup> Current Address: Institute of Virology, Technical University of Munich, Munich, Germany

18 \*These authors contributed equally to this work

19 **Running title:** HSV-1 cell-to-cell spread neutralizing antibodies: Correlates of protection

20 \*Corresponding author:

21 Adalbert Krawczyk

22 Department of Infectious Diseases

23 University of Duisburg-Essen

24 D-45147 Essen

25 Tel.: +49-201-723-85458

26 Fax: +49-201-723-5929

27 [adalbert.krawczyk@uni-due.de](mailto:adalbert.krawczyk@uni-due.de)

28 **Abstract (200 words)**

29 Herpes simplex viruses (HSV) cause ubiquitous human infections. For vaccine development,  
30 knowledge concerning correlates of protection against HSV is essential. Therefore, we  
31 investigated if humans principally can produce highly protective cell-to-cell spread inhibiting  
32 antibodies upon natural infection and whether such antibody responses correlate with  
33 protection from HSV reactivation. We established a high-throughput HSV-1 GFP reporter virus-  
34 based assay and screened 2496 human plasma samples for HSV-1 cell-to-cell spread  
35 inhibiting antibodies. We conducted a survey among the blood donors to analyze the  
36 correlation between the presence of cell-to-cell spread inhibiting antibodies in plasma and the  
37 frequency of HSV reactivations. In total, 128 of 2496 blood donors (5.1 %) exhibited high levels  
38 of HSV-1 cell-to-cell spread inhibiting antibodies in the plasma. Such individuals showed a  
39 significantly lower frequency of HSV reactivations compared to subjects without sufficient  
40 levels of HSV-1 cell-to-cell spread inhibiting antibodies. This study provides two important  
41 findings: (I) a fraction of humans produce HSV cell-to-cell spread inhibiting antibodies upon  
42 natural infection and (II) such antibodies correlate with protection against recurrent HSV.  
43 Moreover, these elite neutralizers can provide promising material for hyperimmunoglobulin,  
44 the isolation of superior antiviral antibodies and information for the design of a vaccine against  
45 HSV.

46

47 **Importance:**

48 Herpes simplex virus 1 infections can cause painful mucosal lesions at the oral or genital tract  
49 and severe, life threatening disease in immunosuppressed patients or neonates. There is no  
50 approved vaccine available, and the emergence of drug resistances especially in long time  
51 treated patients makes the treatment increasingly difficult. We tested 2496 people for HSV-1  
52 cell-to-cell spread inhibiting antibodies. Five percent exhibited functional titers such antibodies  
53 and showed significantly lower risk of reactivations, uncovering cell-to-cell spread inhibiting  
54 antibodies as a correlate of protection against Herpes simplex virus reactivations. Isolation of  
55 the cell-to-cell spread inhibiting antibodies from B-cells of these donors may contribute to

56 develop novel antibody-based interventions for prophylactic and therapeutic use and provide  
57 starting material for vaccine development.  
58

59 **Introduction (Main body text: 2671 words)**

60 Herpes simplex viruses (HSV) types 1 and 2 are among the most common human infections  
61 worldwide. Globally, more than 3.7 billion people are infected with HSV-1 [1] and nearly 500-  
62 million with HSV-2 [2]. Both viruses cause a broad range of disease manifestations ranging  
63 from painful and irritating but self-limiting oral or genital lesions to severe disseminated and  
64 life-threatening infections in immunocompromised patients [2-5]. Serious complications can  
65 also be observed in patients suffering from ocular herpes infections, which may result in  
66 irreversible damage of the eye or even blindness [6, 7].

67 Until today, there is no approved vaccine available [8]. Numerous animal studies investigating  
68 the efficacy of distinct vaccine candidates such as inactivated virus particles, live- or genetically  
69 attenuated viruses or recombinant subunit vaccines yielded promising results [9, 10]. However,  
70 none of the vaccine candidates being tested in clinical trials has been effective [8]. The  
71 GlaxoSmithKline (GSK) Herpevac trial using a recombinant HSV-2 glycoprotein D (gD2)  
72 subunit vaccine was largest clinical trial performed so far [11]. In strong contrast to prior animal  
73 studies, the vaccine failed to protect against the acquisition of HSV-2 infection [11]. The  
74 discrepancy between promising results of animal studies and the failure of clinical trials in  
75 humans indicated a fundamental difference in the immune response to HSV in mice or guinea  
76 pigs and humans. Retrospective studies uncovered differences in antibody responses  
77 between humans and rodents concerning virus-specific antibodies, neutralizing antibodies,  
78 and cell-to-cell spread inhibiting, neutralizing antibodies (CCSi-NABs). Most recently, the  
79 antibody responses to the gD2 subunit vaccine were analyzed in humans and guinea pigs [12].  
80 Antibodies produced by vaccinated humans recognized significantly fewer crucial gD2  
81 epitopes as compared to guinea pig antibodies [12, 13]. The crucial gD2 epitopes are targets  
82 of neutralizing or cell-to-cell spread inhibiting antibodies [14]. The cell-to-cell spread of HSV is  
83 known as a mechanism of immune evasion, and markedly facilitates the spread of HSV upon  
84 reactivation [14]. Antibodies, which can block this route of viral transmission, are associated  
85 with protection from disease [12, 15]. We developed a highly neutralizing and cell-to-cell  
86 spread inhibiting monoclonal antibody called mAb 2c. This antibody mediates almost complete

87 protection from lethal genital HSV-1 infection - even in highly immunodeficient NOD/SCID mice  
88 [15, 16]. Moreover, mAb 2c protects mice from the development of severe ocular infections  
89 [17-19]. Importantly, mAb 2c is significantly more effective in protecting from disease than  
90 polyclonal human neutralizing antibodies used at a similar neutralizing titer, highlighting the  
91 importance of the inhibition of cell-to-cell spread in protecting from disease [20]. These *in vitro*  
92 and *in vivo* data strongly suggested that neutralizing antibodies, which inhibit the cell-to-cell  
93 spread are superior to antibodies that “just” neutralize but do not inhibit the cell-to-cell spread  
94 [20]. These findings raise the apparent question, if the inhibition of the cell-to-cell spread might  
95 contribute to protection from primary and/or recurrent disease. Intriguingly, the re-evaluation  
96 of the GSK Herpevac trial revealed that gD2 immunized individuals only barely produced  
97 antibodies that targeted gD2 epitopes associated with cell-to-cell spread [13], raising the  
98 fundamental question whether humans are in principle able to produce cell-to-cell spread  
99 inhibiting antibodies against HSV.

100 To address this question, we established a HSV-1 GFP reporter virus-based high-throughput  
101 screening assay and tested 2496 plasma samples for cell-to-cell spread inhibiting antibodies.  
102 We show for the first time that a small fraction of humans is indeed able to produce functional  
103 levels of cell-to-cell spread inhibiting antibodies (elite responder) and - even more striking -  
104 that the presence of sufficient concentrations of such antibodies correlated with protection from  
105 HSV reactivation.

## 106 **Results**

107 To evaluate whether humans are able to produce potent antiviral antibodies upon natural HSV-  
108 1 infection, we established a high-throughput assay to test human plasma and serum samples  
109 for HSV-1 cell-to-cell spread inhibiting properties.

110

### 111 **HSV-1- $\Delta$ gE-GFP reporter virus-based screening assay for cell-to-cell spread inhibiting** 112 **antibodies**

113 The screening assay is based on the quantification of the progressing plaque expansion, which  
114 correlates with the extent of cell-to-cell spread. By using the HSV-1- $\Delta$ gE-GFP reporter virus,  
115 plaque formation, which is proportional to the GFP expression level, can be quantified using a  
116 fluorescence reader and visualized by fluorescence microscopy (Fig. 1). Confluent Vero cell  
117 monolayers were infected with the HSV-1- $\Delta$ gE-GFP reporter virus at a low multiplicity of  
118 infection (MOI = 0.001). Thereby, only scattered cells within the cell layer become infected.  
119 Afterwards, the infected cell cultures were overlaid with medium containing the sample to be  
120 tested, e.g. serum, plasma or purified antibodies (Fig. 1). The test was evaluated 3 days after  
121 infection in a quantitative manner by assessing the GFP signal or in a qualitative manner by  
122 fluorescence microscopy (Fig. 1). Single infected cells accompanied by a low GFP signal  
123 represent a complete inhibition of the cell-to-cell spread. Unrestricted plaque formation and  
124 strong GFP signals at levels similar to those of the HSV-1 seronegative control were scored  
125 as no inhibition of the cell-to-cell spread. Small plaques and moderate GFP signals indicated  
126 the presence of cell-to-cell spread inhibiting antibodies in the sample, even if there was no  
127 complete inhibition of the cell-to-cell spread (Fig. 1).

128

### 129 **Evaluation of an HSV-1- $\Delta$ gE-GFP-based high-throughput screening assay for cell-to-** 130 **cell spread inhibiting antibodies**

131 The HSV-1- $\Delta$ gE-GFP-based high-throughput screening assay was first evaluated using the  
132 humanized antibody mAb hu2c that completely inhibits HSV-1 and HSV-2 cell-to-cell spread  
133 (Fig. 2). Confluent Vero cell cultures were infected with HSV-1- $\Delta$ gE-GFP and subsequently

134 overlaid with medium containing graded concentrations (0 - 500 nM) of mAb hu2c. Plasma or  
135 serum from an HSV-1 and HSV-2 double seronegative donor was added at a 1:40 dilution.  
136 Complete inhibition of the cell-to-cell spread could be observed at mAb hu2c concentrations  
137 between 125 and 500 nM (Fig. 2A). Almost complete inhibition was observed at 62.5 nM. At  
138 this concentration, only very small plaques with a maximum of 4 infected cells/plaque were  
139 visible (Fig. 2A) and the quantitative analysis showed an almost unchanged GFP signal  
140 compared to higher mAb hu2c concentrations (Fig. 2B). This concentration represents the  
141 lowest mAb hu2c concentration that almost completely inhibits the cell-to-cell spread (Fig. 2A,  
142 dashed line). At concentrations between 2 and 7.8 nM of mAb hu2c there was no visible  
143 reduction of the cell-to-cell spread (Fig. 2A) and the GFP-signal was notably higher when  
144 compared to concentrations above 62.5 nM mAb hu2c (Fig. 2B). Interestingly, plaques were  
145 smaller at mAb hu2c concentrations between 15.6 and 31.3 nM mAb hu2c (Fig. 2A)  
146 accompanied by only slightly increased GFP-signals (Fig. 2B), indicating a partial inhibition of  
147 the cell-to-cell spread at these concentrations.  
148 These data clearly show that the quantitative measurement of the GFP signal correlates with  
149 the plaque expansion observed in cell-culture, which obviously represents the extent of the  
150 HSV-1 cell-to-cell spread. Furthermore, our assay distinguishes complete, partial and no  
151 inhibition of the HSV-1 cell-to-cell spread.

152

### 153 **Identification of HSV-1 elite responders with cell-to-cell spread inhibiting antibodies**

154 To investigate whether humans can produce HSV-1 cell-to-cell spread inhibiting antibodies,  
155 plasma samples from 2496 blood donors were screened for cell-to-cell spread inhibiting  
156 properties. All samples were tested using the high-throughput screening assay described  
157 above. A mAb hu2c positive control was included on each 24-well plate. The efficacy of the  
158 plasmas regarding cell-to-cell spread inhibition was determined by dividing the GFP-signal of  
159 a culture containing the plasma of interest through the GFP-signal of mAb hu2c-treated control  
160 exhibiting “complete inhibition”. This quotient was termed inhibitory quotient (IQ) and  
161 represents the x-fold value of the GFP-signal measured for mAb hu2c. Plasmas were stratified

162 according to their cell-to-cell spread inhibiting activity as completely inhibiting ( $IQ \leq 1.5$ ),  
163 partially inhibiting ( $IQ = 1.51$  to  $< 2.8$ ) and non-inhibiting ( $IQ \geq 2.8$ ). In total, 128 (5.1 %) of the  
164 plasmas showed complete and 1061 (42.5 %) exhibited partial inhibition (Fig. 3). The fold  
165 change of the remaining 1307 (52.4 %) plasmas was in a similar range as plasmas derived  
166 from HSV-1 seronegative donors and had no effect on the cell-to-cell spread. None of the 147  
167 HSV-1 seronegative control plasmas exhibited partial or complete cell-to-cell spread inhibition,  
168 demonstrating the specificity of the assay.

169

### 170 **Assessment of the frequency of HSV reactivations in plasma donors**

171 Next, we assessed the frequency of HSV reactivations in blood donors to investigate whether  
172 there is a correlation between the presence of cell-to-cell spread inhibiting antibodies and the  
173 frequency of reactivations. For this purpose, we conducted a retrospective survey including  
174 158 blood donors that were randomly selected from the complete inhibition group ( $n = 47$ ),  
175 partial inhibition group ( $n = 58$ ) and the no inhibition group ( $n = 53$ ). The HSV-seropositive  
176 status was confirmed by a diagnostic IgG ELISA. The biometric characteristics of the three  
177 different inhibition groups are summarized in Table 1. All three groups were comparable  
178 regarding mean age, gender, smoking behavior as well as the mean body mass index (BMI).  
179 Next, the three different groups were evaluated regarding the frequency of HSV reactivations.  
180 The frequency of HSV reactivations was recorded according to the observed occurrence of  
181 oral or genital lesions with less than one time per year or one or more symptomatic  
182 reactivations per year ( $< 1$  or  $\geq 1$  reactivation per year). Interestingly, study participants from  
183 the complete inhibition group showed significant lower frequencies of HSV reactivation as  
184 compared to the groups that show only partial or no cell-to-cell spread inhibition capacity  
185 (Fig. 4). Only 17 % of individuals from the complete inhibition group reported one or more  
186 reactivation per year, whereas the frequency of at least one reactivation per year was 38 % in  
187 the partial inhibition group and 36 % in the no inhibition group. These data clearly demonstrate  
188 a significant correlation between the presence of cell-to-cell spread inhibiting antibodies and a  
189 lower rate of HSV-reactivation, providing a strong argument for their functional relevance in



190 preventing recurrent herpes disease.

191

## 192 **Determination of the neutralizing antibody titers of blood donor plasmas**

193 To investigate whether antibodies capable to neutralize HSV-1 but incapable to block the cell-  
194 to-cell spread of the virus have an impact on the frequency of HSV-1 reactivations, we  
195 determined the neutralizing titers of the donor plasmas that completed the survey.

196 Although there was a significant difference in the frequency of reactivations between the  
197 complete inhibition group and partial inhibition group (Fig. 4), the neutralizing antibody titers  
198 were at similar levels (Fig. 5). Only the no inhibition group was shown to have significantly  
199 lower neutralization titers compared to the complete inhibition and partial inhibition group.

200 These results indicate that the significantly lower HSV-reactivation likelihood observed for the  
201 complete inhibition group correlates with cell-to-cell spread inhibiting antibodies but not with  
202 antibodies that neutralize the virus but fail to counteract the cell-to-cell spread.

203 In conclusion, we showed for the first time that (i) about five percent of HSV-1 seropositive  
204 blood donors (elite responder) are able to produce HSV-1 cell-to-cell spread inhibiting  
205 antibodies and (ii) that the presence of these antibodies correlate with a significantly lower risk  
206 of HSV-reactivation.

207 **Discussion**

208 In the present study, we investigated whether humans are able to produce antibodies that  
209 effectively block the HSV-1 cell-to-cell spread upon natural infection. We demonstrated that  
210 humans are principally able to produce such cell-to-cell spread inhibiting antibodies against  
211 HSV-1.

212 In our large cohort of 2496 blood donors, we identified a small proportion of 128 (5.1 %) that  
213 had a sufficiently high antibody-concentration to block the cell-to-cell spread of HSV-1 in cell  
214 culture (elite responder). Most importantly, these individuals reported a significantly lower  
215 frequency of symptomatic HSV-reactivations when compared to people with lower or no  
216 detectable cell-to-cell spread inhibiting antibodies.

217 Interestingly, 42.5 % of the plasmas showed a partial inhibition of the cell-to-cell spread,  
218 indicating that there might be cell-to-cell spread inhibiting antibodies in the plasmas, but at  
219 lower concentrations. The average concentration of antibodies in human sera/plasma was  
220 described with 11 mg/ml [21]. In the present study, we tested the plasma samples at a 1:40  
221 dilution, which corresponds to a median IgG concentration of 0.28 mg/ml. At least in 5 % of  
222 individuals whose plasmas showed complete cell-to-cell spread inhibition in our high-  
223 throughput, this concentration was sufficient to prevent reinfections.

224 However, we found that there was no correlation between neutralizing antibody titers and the  
225 frequency of HSV reactivation. Despite similar neutralizing antibody titers, people who had  
226 cell-to-cell spread inhibiting antibody concentrations in plasma reported significantly fewer rate  
227 of HSV-reactivations than people with insufficient concentrations of such antibodies did. These  
228 data provide evidence for the unique protective role of cell-to-cell spread inhibiting antibodies  
229 in HSV infection.

230 These data support prior findings. Neutralizing antibodies, which are not necessarily inhibiting  
231 the cell-to-cell spread, contributed to protect from a severe course of disease [22]. The  
232 presence of HSV-specific antibodies in HSV-infected mothers has been suggested to decrease  
233 the risk of acquisition of HSV-2 by newborns [23, 24]. Similar findings were reported in mice.  
234 Maternal antibodies were shown to access neural tissues of the fetus or neonate, thereby

235 protecting neonatal mice against HSV-1 neurological infection and death [24]. Notably, in  
236 animal studies neutralizing antibodies blocking virus entry and cell-to-cell spread were superior  
237 to normal neutralizing antibodies that did not inhibit the cell-associated viral spread [20]. These  
238 data are in line with our here presented findings.

239 In conclusion, by using a high-throughput HSV-1- $\Delta$ gE-GFP reporter assay we have  
240 demonstrated that HSV-1 infected humans are able to produce cell-to-cell spread inhibiting  
241 antibodies. In addition, we were able to show that the presence of these antibodies directly  
242 correlates with a significantly lower frequency of HSV reactivations, representing a correlate  
243 of protection. Plasmas of these individuals may be used for passive immunization strategies.  
244 Isolation of the cell-to-cell spread inhibiting antibodies may contribute to develop novel  
245 antibody-based interventions for prophylactic and therapeutic use. Moreover, characterizing of  
246 epitopes recognized by these antibodies may contribute to optimize the target antigens for  
247 novel vaccine approaches.

248 **Material and methods**

249

250 **Ethics statement**

251 The study was performed in accordance with The Code of Ethics of the World Medical  
252 Association (Declaration of Helsinki) and was approved by the ethical committee of the  
253 University of Ulm and the University Hospital Essen.

254

255 **Antibodies, Sera and Plasma**

256 Sera and plasma samples were harvested during routine blood donations at the Institute of  
257 Transfusion Medicine, University of Ulm, Germany. The humanized monoclonal antibody mAb  
258 hu2c was produced and purified as described previously [15].

259

260 **Viruses**

261 HSV-1 strain F, HSV-2 strain G and HSV-1- $\Delta$ gE-GFP reporter virus were propagated in Vero  
262 cells and stored at  $-80^{\circ}\text{C}$ . HSV-1- $\Delta$ gE-GFP was kindly provided by Hartmut Hengel (Institute  
263 of Virology, Freiburg, Germany) and initially described by Farnsworth et al. [21]. Viral titers  
264 were determined by a standard endpoint dilution assay and calculated as 50 % tissue culture  
265 infectious dose (TCID<sub>50</sub>)/ml as previously described [22].

266

267 **Cells**

268 Vero cells (American Type Culture Collection, ATCC, CCL81, Rockville, MD) were cultured in  
269 Dulbecco's Modified Eagle Medium (DMEM, Life Technologies Gibco, Darmstadt, Germany)  
270 containing 10 % (v/v) fetal calf serum (FCS; Life Technologies Gibco), 100 U/ml penicillin and  
271 0.1 mg/ml streptomycin.

272

273 **HSV-1- $\Delta$ gE-GFP based screening for cell-to-cell spread inhibiting antibodies**

274 To investigate whether humans are able to produce cell-to-cell spread inhibiting antibodies,  
275 we established an HSV-1- $\Delta$ gE-GFP reporter virus based assay for the high-throughput

276 screening of HSV-1 seropositive human serum or plasma samples. The assay was evaluated  
277 using the HSV-1 and HSV-2 cell-to-cell spread inhibiting antibody mAb hu2c [15].  
278 Highly permissive Vero cells were seeded on 24-well plates at a density of  $1 \times 10^5$  cells/well.  
279 Confluent cell cultures were infected with 200 TCID<sub>50</sub> HSV-1- $\Delta$ gE-GFP/well (MOI = 0.001).  
280 After 2 hours of incubation, the inoculation medium was removed and the cell cultures were  
281 incubated with serial dilutions of mAb hu2c (0 - 500 nM). Commercial polyclonal human  
282 antibody preparations, Cytotect and Intratect (Biotest, Dreieich, Germany), were used as  
283 controls at a concentration of 1 or 2 mg/ml. To standardize the background levels, all purified  
284 antibodies were applied in medium containing serum or plasma from an HSV-1 and HSV-2  
285 seronegative donor at a 1:40 (v/v) dilution. After 3 days of incubation, the plaque formation  
286 was examined by fluorescence microscopy (Axio Observer D1, Zeiss). Additionally, the  
287 fluorescence levels were quantified. For this purpose, the cell culture medium was removed,  
288 the cells washed with PBS, detached with Trypsin/0.5% EDTA (Life Technologies Gibco),  
289 resuspended and transferred to 96-well plates. GFP-signals were quantified using the Mithras<sup>2</sup>  
290 LB 943 microplate multimode reader (Berthold Technologies).

291

### 292 **High throughput screening of plasmas for the inhibition of HSV-1 cell-to-cell spread**

293 A total number of 2496 human plasmas were screened for the inhibition of the HSV-1 cell-to-  
294 cell spread using the high throughput assay as described above. Human plasma samples were  
295 applied at 1:40 dilutions. The monoclonal humanized antibody mAb hu2c served as positive  
296 control at a concentration of 500 nM (75  $\mu$ g/ml) diluted in plasma from an HSV-1/2  
297 seronegative donor (1:40 in cell culture medium). At this concentration of mAb hu2c, the HSV  
298 1 cell-to-cell spread is completely blocked. After 72 hours of incubation, the GFP-signal was  
299 measured using the Mithras<sup>2</sup> LB 943 microplate multimode reader (Berthold Technologies).  
300 Fluorescence-values for individual plasma samples were compared with the GFP-intensity  
301 measured for mAb hu2c for each plate. The values obtained for the plasma samples were then  
302 normalized to the mAb hu2c control and calculated as the x-fold value of the mAb hu2c signal.

303

304 **Identification of HSV-seropositive plasmas by ELISA**

305 The HSV-seropositivity status of donors completing the survey was confirmed by ELISA using  
306 the anti-herpes simplex virus type 1 and 2 IgG human ELISA kit (abcam, Cambridge, United  
307 Kingdom) according to manufacturer's instructions.

308

309 **Retrospective survey to determine the frequency of HSV-reactivations**

310 To investigate the role of HSV-1 cell-to-cell spread inhibiting antibodies in HSV-seropositive  
311 people, we assessed the frequency of symptomatic HSV reactivations in the frame of a  
312 retrospective survey. The data acquisition comprised the annual numbers of symptomatic oral  
313 or genital HSV-reactivations characterized by the occurrence of characteristic lesions.  
314 Furthermore, data on general topics like age, gender, body mass index (BMI) as well as  
315 smoking behavior were collected. The survey enrolled a total number of 158 blood donors  
316 stratified in three comparable groups according to the presence of cell-to-cell spread inhibiting  
317 antibodies as complete inhibition (n = 47), partial inhibition (n = 58) and no inhibition (n = 53).

318

319 **Neutralization assay**

320 To investigate the neutralizing antibody titers in blood donor plasmas, a neutralization assay  
321 was performed as previously described [16]. Briefly, serial dilutions (1:20 to 1:2560) of the  
322 respective plasma samples were pre-incubated with 100 TCID<sub>50</sub> of HSV-1 F for one hour at  
323 37 °C and added afterwards to confluent Vero cells cultured in 96-well microtiter plates. After  
324 72 hours, the cytopathic effect was analyzed by microscopy and the reciprocal neutralization  
325 titer was determined.

326 **Footnote Page**

327

328 **Funding**

329 This study was funded by the German Research Foundation “DFG” (GZ: KR 4476/2-1,  
330 awarded to AK) the Stiftung Universitätsmedizin Essen (Awarded to AK) and the Rudolf  
331 Ackermann Foundation (Awarded to OW). The funder had no role in study design, data  
332 collection and analysis, decision to publish, or preparation of the manuscript.

333

334 **Acknowledgements**

335 The authors thank Delia Cosgrove for the proofreading of the manuscript.

336

337 **Author Contributions**

338 SW, MA, RD, MD and UWA performed the experiments. SW, MA, RD, MD, UWA, BG, MR,  
339 UD, OW, MT, CH and AK analyzed the data. KR conducted the survey. RL, MR and AK  
340 planned the study. SW, MA, CH and AK wrote the manuscript. All authors approved the final  
341 version of the manuscript.

342

343 **Conflict of interest**

344 The authors declare that the research was conducted in the absence of any commercial or  
345 financial relationship that could be construed as a potential conflict of interest.

346

347 **References**

348

- 349 1. Looker KJ, Magaret AS, May MT, et al. Global and Regional Estimates of Prevalent and  
350 Incident Herpes Simplex Virus Type 1 Infections in 2012. *PLoS One* **2015**; 10:e0140765.
- 351 2. Looker KJ, Magaret AS, Turner KM, Vickerman P, Gottlieb SL, Newman LM. Global  
352 estimates of prevalent and incident herpes simplex virus type 2 infections in 2012. *PLoS One*  
353 **2015**; 10:e114989.
- 354 3. Bernstein DI, Bellamy AR, Hook EW, 3rd, et al. Epidemiology, clinical presentation, and  
355 antibody response to primary infection with herpes simplex virus type 1 and type 2 in young  
356 women. *Clin Infect Dis* **2013**; 56:344-51.
- 357 4. Shin H, Iwasaki A. Generating protective immunity against genital herpes. *Trends in*  
358 *immunology* **2013**; 34:487-94.
- 359 5. Whitley RJ, Roizman B. Herpes simplex virus infections. *Lancet* **2001**; 357:1513-8.
- 360 6. Burrell S, Boutolleau D, Azar G, et al. Phenotypic and genotypic characterization of  
361 acyclovir-resistant corneal HSV-1 isolates from immunocompetent patients with recurrent  
362 herpetic keratitis. *J Clin Virol* **2013**; 58:321-4.
- 363 7. Lau CH, Missotten T, Salzmann J, Lightman SL. Acute retinal necrosis features,  
364 management, and outcomes. *Ophthalmology* **2007**; 114:756-62.
- 365 8. McAllister SC, Schleiss MR. Prospects and perspectives for development of a vaccine  
366 against herpes simplex virus infections. *Expert Rev Vaccines* **2014**; 13:1349-60.
- 367 9. Johnston C, Corey L. Current Concepts for Genital Herpes Simplex Virus Infection:  
368 Diagnostics and Pathogenesis of Genital Tract Shedding. *Clin Microbiol Rev* **2016**; 29:149-  
369 61.
- 370 10. Dasgupta G, Chentoufi AA, Nesburn AB, Wechsler SL, BenMohamed L. New concepts in  
371 herpes simplex virus vaccine development: notes from the battlefield. *Expert Rev Vaccines*  
372 **2009**; 8:1023-35.
- 373 11. Belshe RB, Leone PA, Bernstein DI, et al. Efficacy results of a trial of a herpes simplex  
374 vaccine. *The New England journal of medicine* **2012**; 366:34-43.
- 375 12. Hook LM, Cairns TM, Awasthi S, et al. Vaccine-induced antibodies to herpes simplex  
376 virus glycoprotein D epitopes involved in virus entry and cell-to-cell spread correlate with  
377 protection against genital disease in guinea pigs. *PLoS Pathog* **2018**; 14:e1007095.
- 378 13. Whitbeck JC, Huang ZY, Cairns TM, et al. Repertoire of epitopes recognized by serum  
379 IgG from humans vaccinated with herpes simplex virus 2 glycoprotein D. *J Virol* **2014**;  
380 88:7786-95.
- 381 14. Sattentau Q. Avoiding the void: cell-to-cell spread of human viruses. *Nature reviews*  
382 *Microbiology* **2008**; 6:815-26.
- 383 15. Krawczyk A, Arndt MA, Grosse-Hovest L, et al. Overcoming drug-resistant herpes  
384 simplex virus (HSV) infection by a humanized antibody. *P Natl Acad Sci USA* **2013**;  
385 110:6760-5.
- 386 16. Krawczyk A, Krauss J, Eis-Hubinger AM, et al. Impact of valency of a glycoprotein B-  
387 specific monoclonal antibody on neutralization of herpes simplex virus. *Journal of virology*  
388 **2011**; 85:1793-803.
- 389 17. Bauer D, Alt M, Dirks M, et al. A Therapeutic Antiviral Antibody Inhibits the Anterograde  
390 Directed Neuron-to-Cell Spread of Herpes Simplex Virus and Protects against Ocular  
391 Disease. *Frontiers in microbiology* **2017**; 8:2115.
- 392 18. Bauer D, Keller J, Alt M, et al. Antibody-based immunotherapy of aciclovir resistant  
393 ocular herpes simplex virus infections. *Virology* **2017**; 512:194-200.
- 394 19. Krawczyk A, Dirks M, Kasper M, et al. Prevention of herpes simplex virus induced  
395 stromal keratitis by a glycoprotein B-specific monoclonal antibody. *PLoS One* **2015**;  
396 10:e0116800.
- 397 20. Eis-Hubinger AM, Schmidt DS, Schneweis KE. Anti-glycoprotein B monoclonal antibody  
398 protects T cell-depleted mice against herpes simplex virus infection by inhibition of virus  
399 replication at the inoculated mucous membranes. *J Gen Virol* **1993**; 74 ( Pt 3):379-85.



- 400 21. Gonzalez-Quintela A, Alende R, Gude F, et al. Serum levels of immunoglobulins (IgG,  
401 IgA, IgM) in a general adult population and their relationship with alcohol consumption,  
402 smoking and common metabolic abnormalities. *Clin Exp Immunol* **2008**; 151:42-50.  
403 22. Belshe RB, Heineman TC, Bernstein DI, et al. Correlate of immune protection against  
404 HSV-1 genital disease in vaccinated women. *J Infect Dis* **2014**; 209:828-36.  
405 23. Brown ZA, Benedetti J, Ashley R, et al. Neonatal herpes simplex virus infection in relation  
406 to asymptomatic maternal infection at the time of labor. *N Engl J Med* **1991**; 324:1247-52.  
407 24. Jiang Y, Patel CD, Manivanh R, et al. Maternal Antiviral Immunoglobulin Accumulates in  
408 Neural Tissue of Neonates To Prevent HSV Neurological Disease. *mBio* **2017**; 8.  
409

410

411 **Figure legends**

412 **Figure 1: Assessment of the HSV-1 cell-to-cell spread inhibiting antibodies of human**  
413 **plasma or serum samples using the HSV-1  $\Delta$ gE GFP reporter virus-based screening**

414 **method.** The procedure was based on assessing the extent of plaque formation, which was  
415 proportional to the GFP-signal emitted by the infected cells. Confluent Vero cells were infected  
416 with HSV-1  $\Delta$ gE GFP reporter virus at low MOI. Infected cell cultures were overlaid with a  
417 medium containing either sera or plasma samples from HSV-seropositive humans at a 1:40  
418 dilution. After 72 h hours of incubation, plaque formation was qualitatively assessed by  
419 fluorescence microscopy and simultaneously the GFP-signal was quantified as relative  
420 fluorescence units (RFU).

421

422 **Figure 2: Evaluation of the HSV-1 cell-to-cell spread inhibition by mAb hu2c.** The

423 performance of the HSV-1  $\Delta$ gE GFP reporter virus-based assay was evaluated for the  
424 screening of sera and plasma that contain various concentrations of HSV-1 cell-to-cell spread  
425 inhibiting antibodies. (A) Confluent Vero cells growing on 24-well plates were infected with 200  
426 TCID<sub>50</sub>/500  $\mu$ l of the HSV-1  $\Delta$ gE GFP reporter virus. After 2 h of incubation, the inoculating  
427 medium was removed and the cells were overlaid with a medium containing sera or plasma  
428 from a HSV-1 seronegative donor at a 1:40 dilution. Additionally, the monoclonal, HSV-1/2  
429 cell-to-cell spread inhibiting antibody mAb hu2c was added at a final concentration ranging  
430 from 0 to 1000 nM. After 72 h hours, plaque formation, which indicates HSV-1 spread via the  
431 cell-to-cell spread, was qualitatively assessed by fluorescence microscopy. 100x  
432 magnification, scale bar = 100  $\mu$ m. (B) Additionally, the cell cultures were transferred to 96-  
433 well plates to quantify the GFP-signal as relative fluorescence units (RFU). Dashed line = cell-  
434 to-cell spread inhibiting concentration of mAb hu2c. Green bars = complete inhibition,  
435 orange = partial inhibition, blue = no inhibition of HSV-1 cell-to-cell spread.

436 **Figure 3: Assessment of the HSV-1 cell-to-cell spread inhibition capacity of plasma**  
437 **samples from HSV-1 seropositive blood donors.** A total number of 2496 plasma samples  
438 from blood donors were investigated for HSV-1 cell-to-cell spreading properties using a  
439 HSV-1  $\Delta$ gE GFP reporter virus-based assay as described above. The efficacy of the plasma  
440 samples regarding cell-to-cell spread inhibition is shown as a fold change of the 500 nM mAb  
441 hu2c threshold (dashed line). At this concentration mAb hu2c completely inhibits the HSV-1  
442 cell-to-cell spread. The efficacy of the plasma samples regarding cell-to-cell spread inhibition  
443 was determined by dividing the GFP-signal of a cell culture treated with a plasma sample  
444 through the GFP-signal of mAb hu2c control. This quotient was termed inhibitory quotient (IQ)  
445 and represents the x-fold value of the GFP-signal measured for mAb hu2c. The plasma  
446 samples were classified as completely cell-to-cell spread inhibiting (green dots,  $IQ \leq 1.5$ ),  
447 partially inhibiting (orange dots,  $IQ = 1.51 - 2.8$ ) and non-inhibiting (blue dots,  $IQ \geq 2.8$ ). Each  
448 point represent the IQ for each donor, horizontal bars represent the median value.

449

450 **Figure 4: Correlation between protective antibody response and the frequency of HSV**  
451 **reactivation.** A total number of 158 HSV seropositive blood donors previously being tested for  
452 cell-to-cell spread inhibiting antibodies were retrospectively interviewed for the frequency of  
453 symptomatic HSV reactivations per year. The donors were divided into the three groups  
454 (complete inhibition,  $n = 48$ ; partial inhibition,  $n = 58$  and no inhibition,  $n = 53$ ) according to the  
455 performance of the donor plasmas on the HSV-1 cell-to-cell spread inhibition. The total  
456 numbers of donors are depicted as a bar chart and the percentages as a pie chart above.  
457 Differences in the annual frequency of HSV reactivation were analyzed using the Fischer's  
458 exact test. Significant changes ( $*p < 0.05$ ) are indicated by asterisks and non-significant  
459 changes ( $p > 0.05$ ) are labeled as "n.s.".

460 **Figure 5: HSV-1 neutralizing antibody titers of the plasma samples of the three inhibition**  
461 **groups (complete, partial and no inhibition group).** Serial dilutions of the respective plasma  
462 samples (1:20 to 1:2560) were preincubated with 100 TCID<sub>50</sub> HSV-1 F for one hour and  
463 subsequently added to Vero cells in 96-well microtiter plates. After 48 h of incubation, the  
464 cytopathic effect was analyzed and the respective neutralization titers were determined. Data  
465 sets were statistically analyzed using the One-way ANOVA followed by the Dunn's multiple  
466 comparison *post-hoc* test. Significant changes (\*\* $p < 0.01$ , \*\*\*\* $p < 0.0001$ ) are indicated by  
467 asterisks and non-significant changes ( $p > 0.05$ ) are labeled as "n.s."  
468

Infection with  
HSV-1 GFP

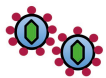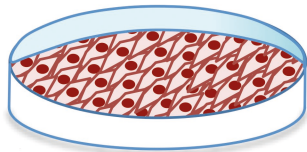

Incubation with  
anti-HSV-1  
antibodies

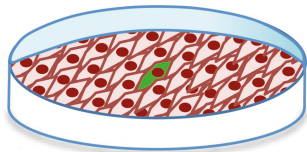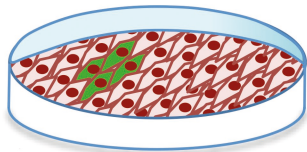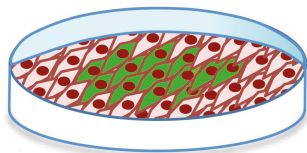

Evaluation of the HSV-1 cell-to-cell spread

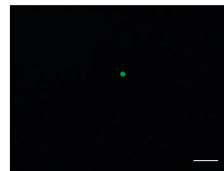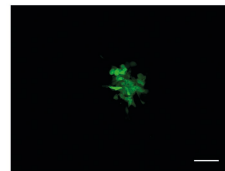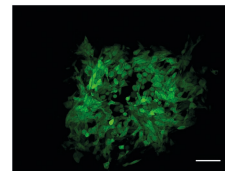

GFP-Absorbance

Complete  
inhibition

Partial  
inhibition

No  
inhibition

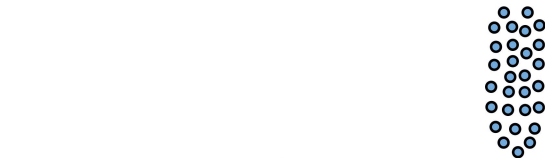

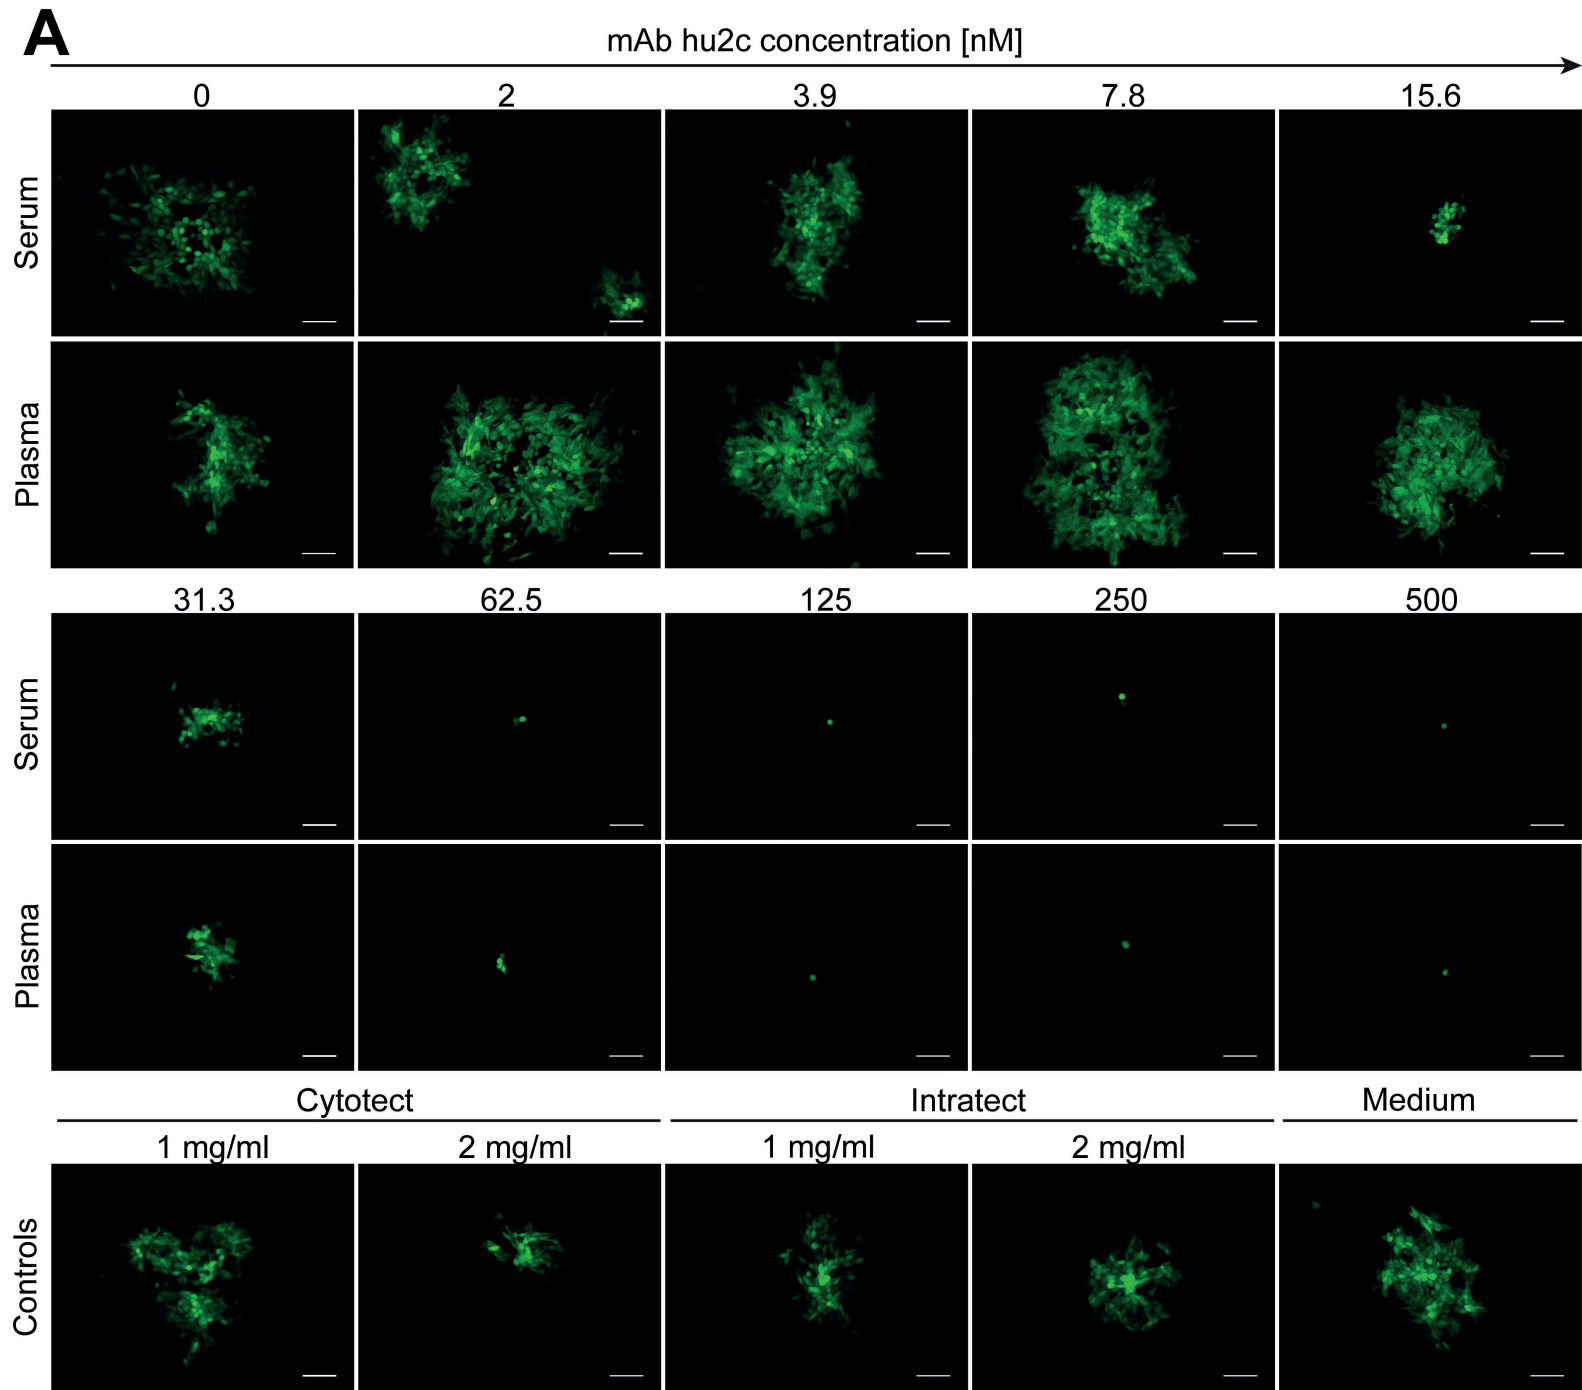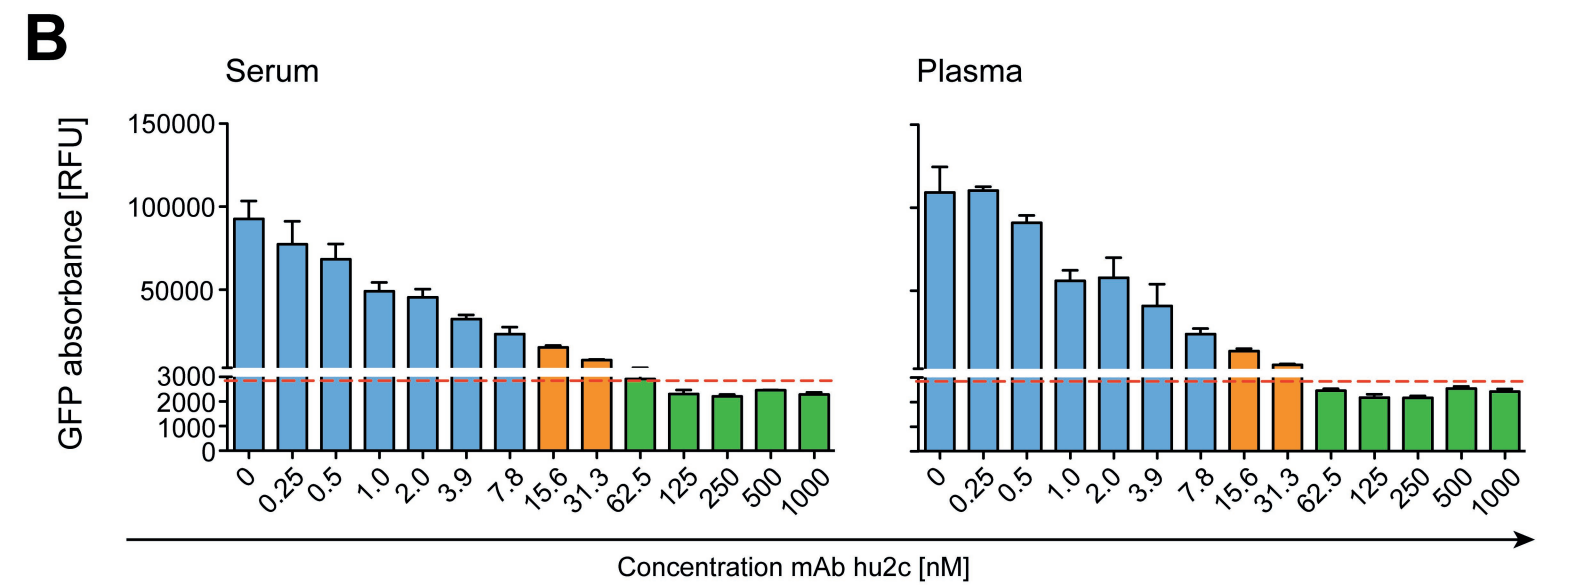

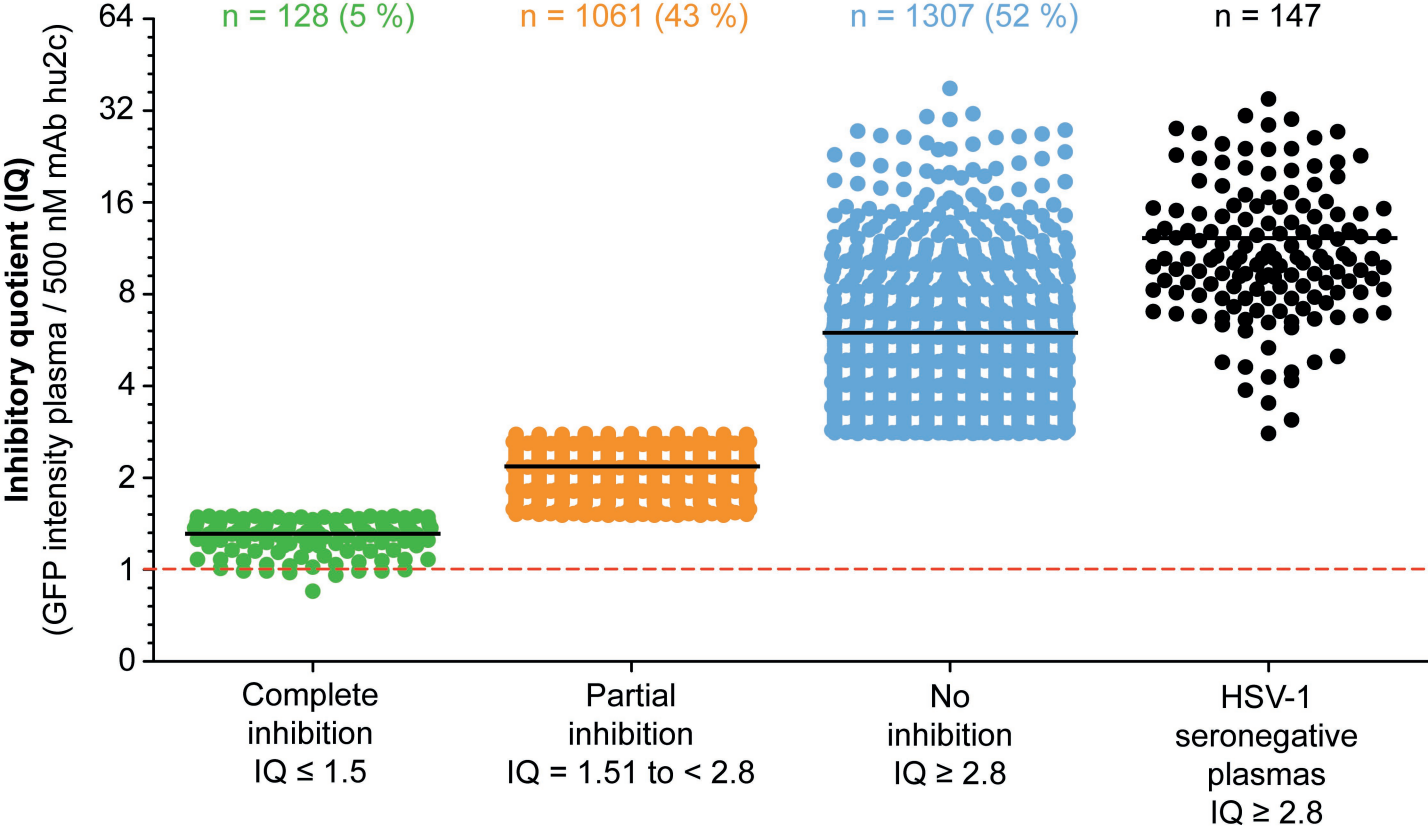

# Frequency of HSV-reactivations

(total numbers and percentages)

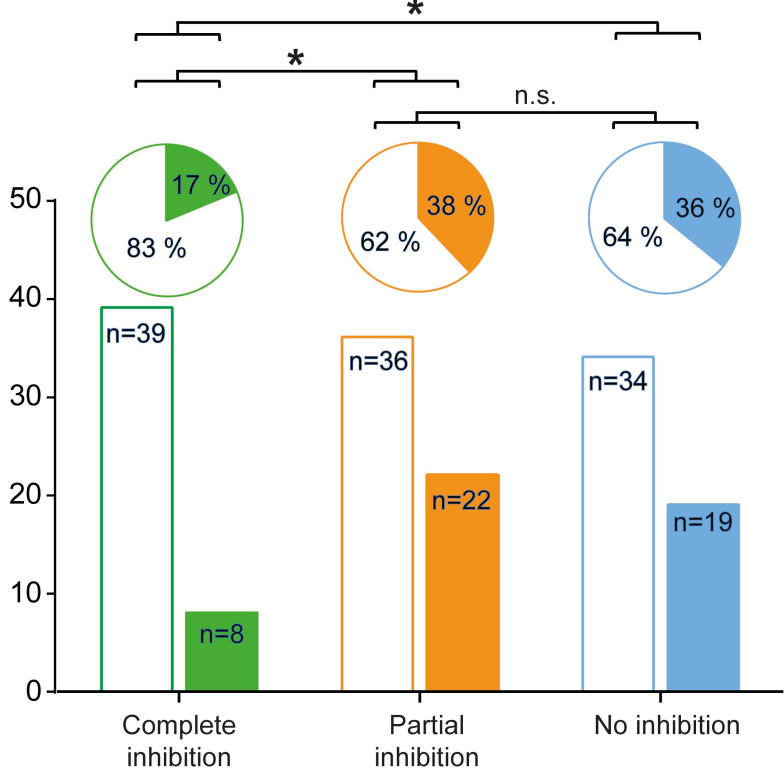

## Complete inhibition

- < 1 per year
- ≥ 1 per year

## Partial inhibition

- < 1 per year
- ≥ 1 per year

## No inhibition

- < 1 per year
- ≥ 1 per year

Effect of donor plasma on HSV-1 cell-to-cell spread
